# Supplementary material
Source: Research Square preprint supplement (doi:10.21203/rs.3.rs-9029520/v1)
Supplement: Supplementary file 1 [file 01332208740ddf7deae50296.docx]

Figure S1. The swelling and degradation properties of hydrogels in PBS at 37 ℃


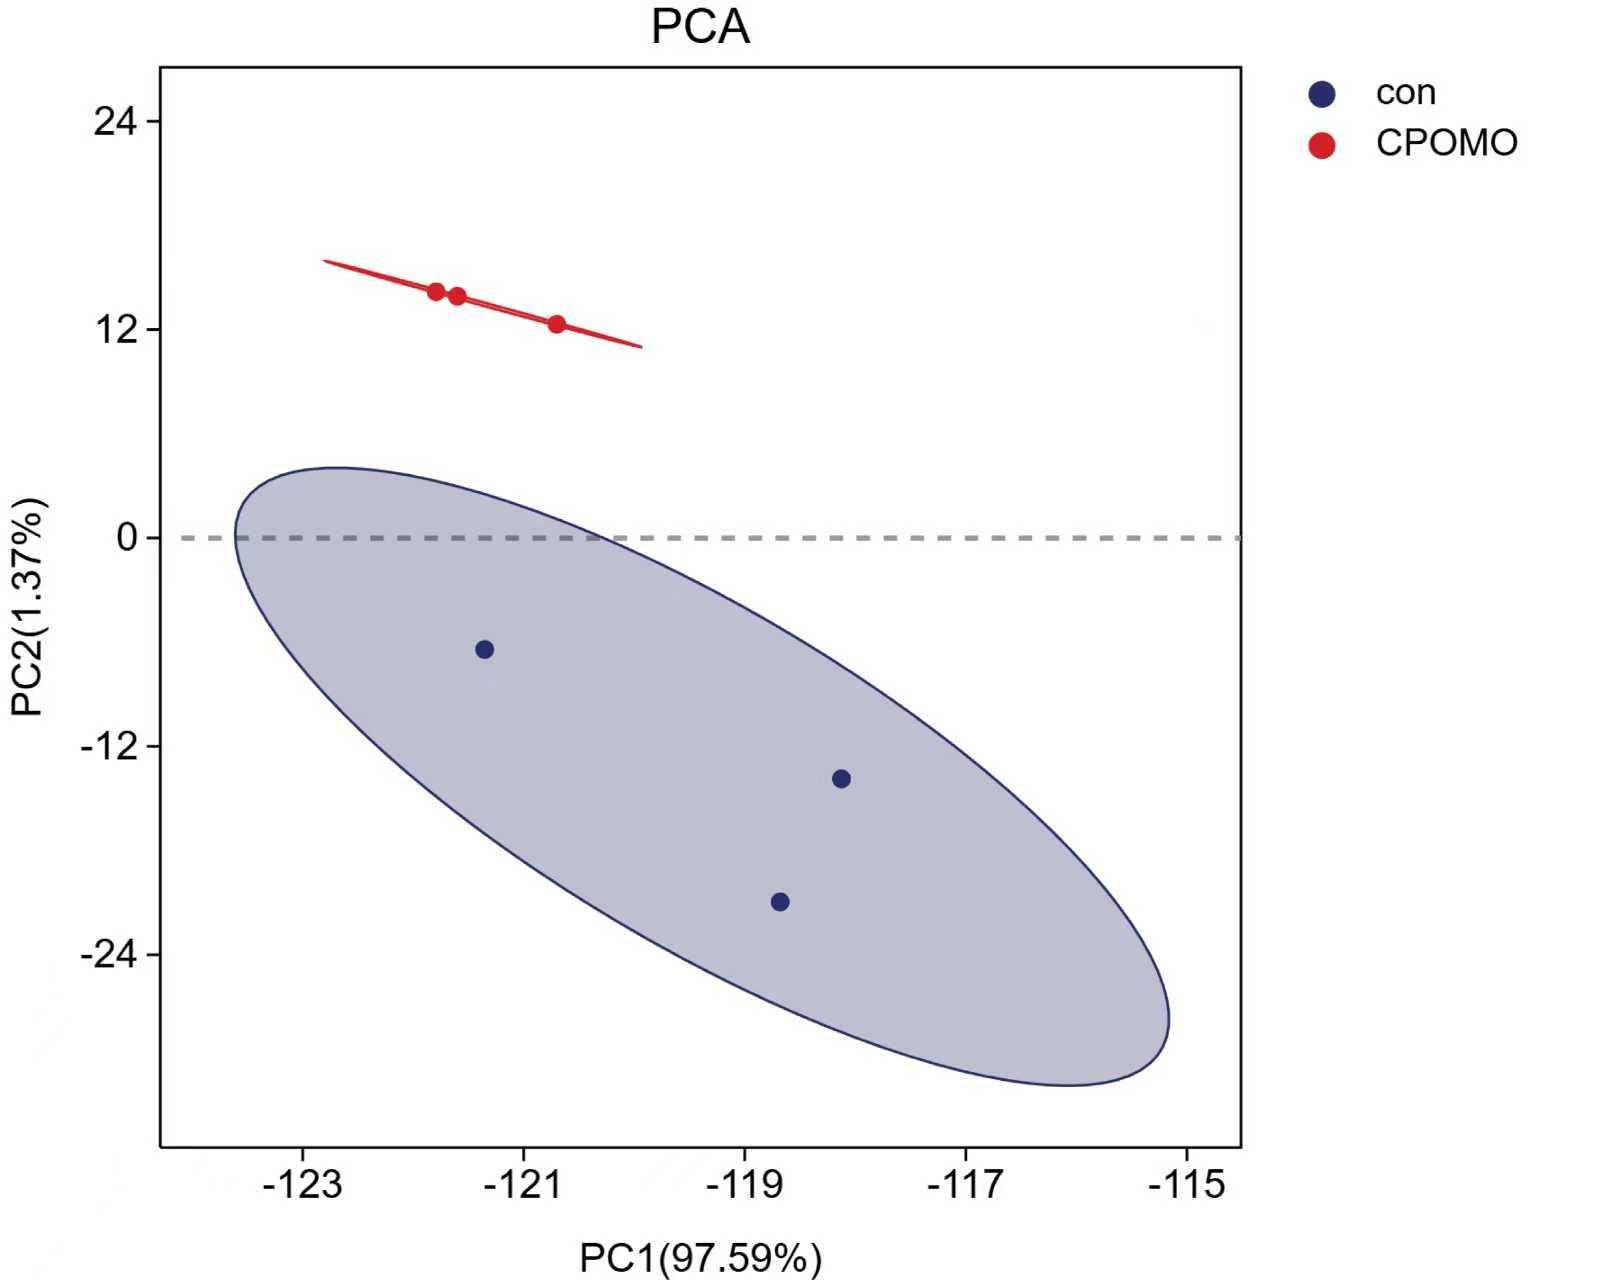


Figure S2. PCA detection of samples between the two groups.
